# Supplementary material for: Tissue Specific DNA Methylation in Normal Human Breast Epithelium and in Breast Cancer
Source: PLOS journal article supplement (doi:10.1371/journal.pone.0091805), 2014-03-20

**Figure S1.** Methylation fold difference of 124 Illumina probes as compared breast to colon, endometrial and lung epithelial tissues.

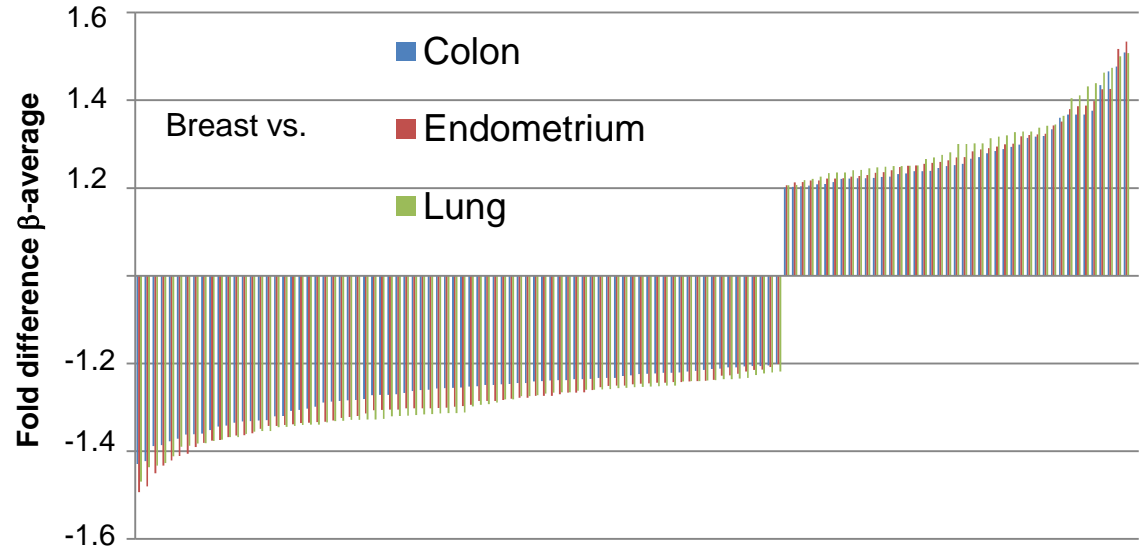

Supplement: S1 (10.1371/journal.pone.0091805.s001) [file journal.pone.0091805.s001]
