# Supplementary material for: Tissue Specific DNA Methylation in Normal Human Breast Epithelium and in Breast Cancer
Source: PLOS journal article supplement (doi:10.1371/journal.pone.0091805), 2014-03-20
Supplement: S6 (10.1371/journal.pone.0091805.s006) [file journal.pone.0091805.s006]

**Table S5.****Comparisons of TRIM29 promoter methylation and gene expression for various normal tissues and respective carcinomas in TCGA****(A)**

|      | BLCA       | BRCA       | COAD     | LUSC     | PAAD     | PRAD     | READ |
|------|------------|------------|----------|----------|----------|----------|------|
| BRCA | 1          | -          | -        | -        | -        | -        | -    |
| COAD | 0.04378801 | 2.09E-05   | -        | -        | -        | -        | -    |
| LUSC | 0.09690264 | 2.20E-07   | 1        | -        | -        | -        | -    |
| PAAD | 1          | 0.07006369 | 1        | 1        | -        | -        | -    |
| PRAD | 2.68E-13   | 2.91E-23   | 2.74E-24 | 6.56E-35 | 2.20E-12 | -        | -    |
| READ | 0.06775645 | 0.00112829 | 1        | 1        | 1        | 1.41E-15 | -    |
| UCEC | 1.07E-06   | 4.30E-19   | 1        | 1.52E-02 | 1.00E+00 | 6.82E-48 | 1    |

Multiple comparisons of TRIM29 promoter methylation in various normal tissues. TCGA data used as described in methods. Analysis for 5 Illumina probes at the TRIM29 TSS region (probes detailed in supplementary table 3). P-values (average for 5 probes) between groups were calculated by t-test and Bonferroni correction.    $p < 0.05$ .

**(B)**

|      | BLCA       | BRCA       | COAD       | LUSC       | PAAD       | PRAD     | READ     |
|------|------------|------------|------------|------------|------------|----------|----------|
| BRCA | 1.12E-66   | -          | -          | -          | -          | -        | -        |
| COAD | 1.12E-27   | 0.00161169 | -          | -          | -          | -        | -        |
| LUSC | 0.06378519 | 8.07E-59   | 4.23E-19   | -          | -          | -        | -        |
| PAAD | 1.36E-24   | 1          | 0.17668472 | 4.57E-18   | -          | -        | -        |
| PRAD | 3.29E-06   | 4.57E-33   | 2.81E-09   | 0.21634977 | 1.61E-11   | -        | -        |
| READ | 3.49E-09   | 2.59E-12   | 0.01105954 | 0.00050761 | 6.08E-06   | 1        | -        |
| UCEC | 8.78E-45   | 0.00112701 | 1          | 2.89E-35   | 0.55122249 | 1.75E-17 | 2.98E-05 |

Multiple Comparisons of TRIM29 promoter methylation in various cancers. TCGA data used as described in methods. Analysis for 5 Illumina probes at the TRIM29 TSS region (probes detailed in supplementary table 3). P-values (average for 5 probes) between groups were calculated by t-test and Bonferroni correction.    $p < 0.05$ .

(C)

|      | BLCA       | BRCA       | LUSC     |
|------|------------|------------|----------|
| BRCA | 1          | -          | -        |
| LUSC | 0.00069134 | 9.74E-11   | -        |
| PRAD | 0.60609728 | 0.79538649 | 7.69E-11 |

Comparisons of TRIM29 gene expression in various normal tissues. TCGA data used as described in methods. P-values were calculated by t-test and Bonferroni correction.   P<0.05

(D)

|      | BLCA       | BRCA       | LUSC     |
|------|------------|------------|----------|
| BRCA | 1          | -          | -        |
| LUSC | 0.00069134 | 9.74E-11   | -        |
| PRAD | 0.60609728 | 0.79538649 | 7.69E-11 |

Comparisons of TRIM29 gene expression in various cancers. TCGA data used as described in methods. P-values were calculated by t-test and Bonferroni correction.   P<0.05

(E) Number of samples in TCGA analysis

| methylation | n (normal) | n (cancer) |            |            |            |
|-------------|------------|------------|------------|------------|------------|
| BRCA        | 97         | 497        |            |            |            |
| PRAD        | 49         | 176        |            |            |            |
| LUSC        | 42         | 226        |            |            |            |
| BLCA        | 18         | 153        | expression | n (normal) | n (cancer) |
| PAAD        | 7          | 49         | BRCA       | 107        | 844        |
| COAD        | 16         | 150        | PRAD       | 39         | 140        |
| READ        | 7          | 95         | LUSC       | 35         | 259        |
| UCEC        | 42         | 383        | BLCA       | 16         | 122        |

For all tables: BRCA=breast carcinoma, PRAD=prostate adenocarcinoma, LUSC=lung squamous cell carcinoma, BLCA=bladder carcinoma, PAAD=pancreatic adenocarcinoma, COAD=colon adenocarcinoma, READ=rectal adenocarcinoma UCEC=uterine-cervix carcinoma. Number of samples in each group is shown in (E).
