# Supplementary material for: Tissue Specific DNA Methylation in Normal Human Breast Epithelium and in Breast Cancer
Source: PLoS One. 2014 Mar 20;9(3):e91805. doi: 10.1371/journal.pone.0091805 (PMC3961270; doi:10.1371/journal.pone.0091805)
Supplement: Table S1 — List of Illumina probes and corresponding genes that were differentially methylated in breast epithelium as compared to colon, lung and endometrial epithelium: Illumina methylation array analysis. (XLSX) [file pone.0091805.s002.xlsx]

## Sheet: Illumina probes
Table S1. List of Illumina probes and corresponding genes that were differentially methylated in breast epithelium
as compared to colon, endometrium and lung epithelium: Results from Illumina Infinium Methylation ArrayK27 analysis.
Gene Symbol	Ilumina Probeset ID	Gene Accession No.	Product Description	Fold-Change (Breast vs. Colon)	Fold-Change (Breast vs. End)	Fold-Change (Breast vs. Lung)
ACCN4	cg19210770	NM_018674.3	amiloride-sensitive cation channel 4 isoform 1	1.33426	1.42544	1.30055
ACCN4	cg17610929	NM_018674.3	amiloride-sensitive cation channel 4 isoform 1	1.37654	1.39793	1.32772
ADAMTS4	cg14448116	NM_005099.3	ADAM metallopeptidase with thrombospondin type 1	-1.38849	-1.30109	-1.32765
AKR1C4	cg09272256	NM_001818.2	aldo-keto reductase family 1; member C4	-1.20576	-1.45011	-1.34508
ALX4	cg26365854	NT_009237.17	homeodomain transcription factor	1.23938	1.27015	1.25102
AMY2A	cg22215192	NM_000699.2	amylase; alpha 2A; pancreatic precursor	-1.20683	-1.28503	-1.29755
ARSE	cg22376897	NM_000047.1	arylsulfatase E precursor	1.27926	1.22945	1.33796
BANK1	cg00332153	NM_017935.2	B-cell scaffold protein with ankyrin repeats 1	1.46637	1.53407	1.50741
C1orf61	cg17727529	NM_006365.1	transcriptional activator of the c-fos promoter	1.31892	1.3876	1.24689
C3orf22	cg24389347	NM_152533.1	hypothetical protein LOC152065	-1.23504	-1.29703	-1.24073
C8orf46	cg23704362	NM_152765.2	hypothetical protein LOC254778	-1.24644	-1.33989	-1.25943
CACNA1G	cg04216597	NT_010783.14	voltage-dependent calcium channel alpha 1G subunit isoform 7	1.22638	1.25124	1.23433
CCDC37	cg00891278	NM_182628.1	hypothetical protein LOC348807	1.24992	1.38635	1.43149
CCDC37	cg20312228	NM_182628.1	hypothetical protein LOC348807	1.28864	1.42623	1.47391
CCKAR	cg04353483	NM_000730.2	cholecystokinin A receptor	-1.32052	-1.36379	-1.38147
CDCP2	cg26185508	NM_201546.2	hypothetical protein LOC200008	-1.38565	-1.33539	-1.48227
CDSN	cg08424423	NM_001264.3	corneodesmosin precursor	-1.22236	-1.2453	-1.23415
CETN1	cg26738010	NM_004066.1	centrin 1	-1.27124	-1.2783	-1.25283
CHRM5	cg22927134	NM_012125.2	cholinergic receptor; muscarinic 5	-1.35202	-1.38084	-1.3315
CIB3	cg09424896	NM_054113.2	DNA-dependent protein kinase catalytic subunit	-1.2266	-1.23714	-1.23988
CLDN6	cg20035459	NM_021195.3	claudin 6	1.36736	1.2174	1.24041
CLDN8	cg04052038	NM_199328.1	claudin 8	-1.25224	-1.3065	-1.29293
CLEC10A	cg21550483	NM_006344.2	C-type lectin; superfamily member 14 isoform 2	-1.23341	-1.26369	-1.26187
CNFN	cg11500727	NM_032488.2	cornifelin	1.27082	1.22246	1.34221
DAND5	cg16854606	NM_152654.2	dante precursor	-1.25654	-1.25421	-1.33933
DCST2	cg21596858	NM_144622.1	hypothetical protein LOC127579	-1.3082	-1.31375	-1.32588
DNAH5	cg14880800	NM_001369.1	dynein; axonemal; heavy polypeptide 5	-1.22112	-1.24215	-1.25622
DYM	cg12875426	NM_017653.2	dymeclin	-1.22421	-1.23919	-1.28154
ECOP	cg08655844	NM_030796.2	EGFR-coamplified and overexpressed protein	1.20141	1.21254	1.25006
EDARADD	cg16240480	NM_080738.2	EDAR-associated death domain isoform B	-1.33504	-1.29831	-1.36787
FAM26B	cg07895149	NM_015916.3	hypothetical protein LOC51063	1.31715	1.3235	1.31702
FEV	cg24178740	NM_017521.2	FEV (ETS oncogene family)	1.22559	1.23514	1.25178
FFAR2	cg15479752	NM_005306.1	G protein-coupled receptor 43	-1.33223	-1.37609	-1.36766
FGF1	cg08816023	NM_033136.1	fibroblast growth factor 1 (acidic) isoform 2 precursor	-1.28123	-1.26996	-1.33424
FHL2	cg10635061	NM_201556.1	four and a half LIM domains 2 isoform 3	1.26703	1.22149	1.36461
FKHL18	cg17631429	NM_004118.3	forkhead-like 18	-1.35938	-1.32982	-1.2384
FLJ20245	cg07717632	NM_017723.1	hypothetical protein LOC54863	1.28453	1.26307	1.26971
FLJ36888	cg20513206	NM_178830.2	hypothetical protein LOC126526	-1.21443	-1.34211	-1.22058
FN1	cg10692870	NM_054034.2	fibronectin 1 isoform 7 preproprotein	1.24598	1.24083	1.27539
FSD1	cg20789620	NM_024333.1	fibronectin type III and SPRY domain containing 1	-1.23276	-1.28537	-1.23558
FSHR	cg17327492	NM_181446.1	follicle stimulating hormone receptor isoform 2 precursor	-1.34181	-1.22759	-1.38715
FXC1	cg25219333	NM_012192.2	fracture callus 1 homolog	-1.20902	-1.30065	-1.2505
GATA5	cg20822628	NT_011362.9	transcription factor	-1.34373	-1.36305	-1.37335
GATA5	cg04132607	NT_011362.9	transcription factor	-1.20862	-1.24002	-1.25058
GATA5	cg16542081	NT_011362.9	transcription factor	-1.20039	-1.21364	-1.21784
GFAP	cg21944455	NM_002055.2	glial fibrillary acidic protein	-1.24094	-1.30207	-1.25827
GPR124	cg20011352	NM_032777.6	G protein-coupled receptor 124	1.22342	1.34277	1.32892
GPR31	cg22182975	NM_005299.1	G protein-coupled receptor 31	-1.24878	-1.33329	-1.31991
GRB10	cg03104936	NT_033968.5	growth factor receptor-bound protein 10 isoform a	-1.26726	-1.26627	-1.35558
HLF	cg04219321	NM_002126.3	hepatic leukemia factor	1.36057	1.32223	1.31349
HOXA11	cg15760840	NM_005523.4	homeobox protein A11	1.22177	1.28363	1.24865
HSD17B1	cg26729026	NM_000413.1	hydroxysteroid (17-beta) dehydrogenase 1	-1.33129	-1.30497	-1.31579
IFNGR2	cg17356733	NM_005534.2	interferon-gamma receptor beta chain precursor	-1.4221	-1.40579	-1.43594
IL17B	cg25141490	NM_014443.2	interleukin 17B precursor	-1.21698	-1.32207	-1.28914
IL17RC	cg05845178	NM_032732.2	interleukin 17 receptor C isoform 3 precursor	1.22246	1.2277	1.22585
IL20	cg01103730	NM_018724.3	interleukin 20 precursor	-1.28905	-1.32425	-1.31323
IL22RA2	cg26112901	NM_181309.1	interleukin 22-binding protein isoform 2	-1.22067	-1.27383	-1.26528
KCTD4	cg21457147	NM_198404.1	potassium channel tetramerisation domain containing 4	-1.24003	-1.28334	-1.36049
KCTD4	cg04439215	NM_198404.1	potassium channel tetramerisation domain containing 4	-1.20619	-1.22497	-1.47625
KIAA1446	cg13673514	NM_020836.2	guanylate kinase-associated protein	1.20589	1.29446	1.32904
KLHDC7B	cg18533225	NM_138433.2	hypothetical protein LOC113730	1.31436	1.29115	1.46321
KRT5	cg04254916	NM_000424.2	keratin 5	-1.36131	-1.35931	-1.37666
KRT5	cg23645091	NM_000424.2	keratin 5	-1.30273	-1.33273	-1.38212
LCE1B	cg08878744	NM_178349.1	late cornified envelope 1B	-1.23244	-1.21821	-1.31385
LYL1	cg04432009	NM_005583.3	lymphoblastic leukemia derived sequence 1	1.20648	1.23562	1.22558
LYL1	cg15013019	NM_005583.3	lymphoblastic leukemia derived sequence 1	1.2524	1.25765	1.26636
LYN	cg03973663	NM_002350.1	v-yes-1 Yamaguchi sarcoma viral related oncogene homolog	1.22105	1.21363	-1.22225
LZTS1	cg08385610	NM_021020.1	leucine zipper; putative tumor suppressor 1	-1.23822	-1.24579	-1.26163
MAGEB4	cg07398429	NM_002367.2	melanoma antigen family B; 4	-1.26976	-1.34214	-1.33982
MAPK8	cg19612574	NM_002750.2	mitogen-activated protein kinase 8 isoform 2	-1.3247	-1.38371	-1.24519
MCM3AP	cg25737836	NM_003906.3	minichromosome maintenance protein 3 associated protein	-1.25195	-1.26572	-1.32834
MEGF11	cg26416466	NM_032445.1	MEGF11 protein	1.29926	1.30002	1.30188
MGC4399	cg13631913	NM_032315.1	mitochondrial carrier protein MGC4399	1.29387	1.28834	1.30172
MGMT	cg02330106	NM_002412.2	O-6-methylguanine-DNA methyltransferase	-1.36211	-1.49303	-1.35422
MIA	cg25152942	NM_006533.1	melanoma inhibitory activity	-1.23897	-1.34907	-1.34243
MT1H	cg10014293	NM_005951.1	metallothionein 1H	1.23333	1.2065	1.23582
MT1H	cg04557383	NM_005951.1	metallothionein 1H	1.4766	1.32092	1.43911
MUC15	cg16215361	NM_145650.2	mucin 15	-1.32929	-1.25077	-1.35411
NCL	cg26862286	NM_005381.2	nucleolin	-1.23564	-1.30233	-1.27469
NEUROG1	cg14958635	NT_034772.5	neurogenin 1	1.23826	1.31826	1.34519
NEUROG1	cg11946503	NT_034772.5	neurogenin 1	1.25506	1.30144	1.32004
NFAM1	cg03017264	NM_145912.4	NFAT activation molecule 1 precursor	-1.31951	-1.30176	-1.33903
NID1	cg22879289	NM_002508.1	nidogen (enactin)	-1.25471	-1.24716	-1.31753
OBP2B	cg15538820	NM_014581.2	odorant binding protein 2B	-1.42928	-1.50043	-1.46928
PAX9	cg26620157	NM_006194.1	paired box gene 9	1.20413	1.25949	1.24122
PAX9	cg00509670	NM_006194.1	paired box gene 9	1.20949	1.25512	1.23553
PEX11G	cg03668539	NM_080662.2	peroxisomal biogenesis factor 11 gamma	-1.25647	-1.47999	-1.31523
POLR1C	cg17102807	NM_203290.1	RNA polymerase I subunit isoform 1	-1.22809	-1.24343	-1.25194
PROK2	cg08555612	NM_021935.2	prokineticin 2	1.20297	1.22164	1.20709
PSORS1C2	cg09508556	NM_014069.1	SPR1 protein	-1.23558	-1.24103	-1.27239
RANBP1	cg02763671	NM_002882.2	RAN binding protein 1	-1.24919	-1.39061	-1.23304
RGL3	cg02433671	XM_934610.1	ral guanine nucleotide dissociation stimulator-like 3 isoform 2	1.50914	1.51725	1.50023
SAA1	cg03458191	NM_199161.1	serum amyloid A1 isoform 2	-1.24764	-1.27384	-1.23786
SAA2	cg12907644	NM_030754.2	serum amyloid A2	-1.23248	-1.20795	-1.43233
SAA2	cg01515887	NM_030754.2	serum amyloid A2	-1.2125	-1.25054	-1.21342
SBSN	cg23680518	NM_198538.1	suprabasin	-1.24512	-1.20454	-1.26139
SCARA5	cg07634191	NM_173833.3	hypothetical protein LOC286133	1.23209	1.25115	1.22099
SCGB2A2	cg22862656	NM_002411.1	secretoglobin; family 2A; member 2	-1.22332	-1.26221	-1.21345
SERPINB13	cg18121684	NM_012397.2	serine (or cysteine) proteinase inhibitor	-1.21192	-1.28002	-1.26586
SLC17A8	cg06563300	NM_139319.1	solute carrier family 17	1.36725	1.38001	1.41105
SLC17A8	cg06836849	NM_139319.1	solute carrier family 17	1.43462	1.35158	1.30066
SLC26A8	cg23807646	NM_052961.2	solute carrier family 26; member 8 isoform a	-1.21809	-1.21442	-1.25336
SMR3B	cg08113203	NM_006685.2	submaxillary gland androgen regulated protein 3 homolog B	-1.24428	-1.22362	-1.29378
SOX10	cg19257200	NM_006941.3	SRY (sex determining region Y)-box 10	-1.28673	-1.33858	-1.32805
SPATA16	cg01216369	NM_031955.2	spermatogenesis associated 16	-1.22332	-1.25007	-1.25943
SREBF1	cg14808739	NM_004176.3	sterol regulatory element binding transcription factor 1 isoform b	-1.2711	-1.26644	-1.2264
ST18	cg15905979	NM_014682.1	suppression of breast cancer tumorigenicity 18	-1.29868	-1.2778	-1.32024
STAR	cg09630404	NM_001007243.1	steroidogenic acute regulator isoform 2	1.23831	1.27031	1.28145
STAT5A	cg16777510	NM_003152.2	signal transducer and activator of transcription 5A	-1.22111	-1.24398	-1.31146
STEAP4	cg11271605	NM_024636.1	tumor necrosis factor; alpha-induced protein 9	1.2136	1.24758	1.25025
STEAP4	cg00564163	NM_024636.1	tumor necrosis factor; alpha-induced protein 9	1.22202	1.23616	1.24466
STON2	cg10334928	NM_033104.2	stonin 2	-1.2852	-1.30228	-1.31853
TICAM1	cg10221736	NM_014261.1	TIR domain containing adaptor inducing interferon-beta isoform 1	-1.26255	-1.2941	-1.25415
TMEM40	cg03534410	NM_018306.2	transmembrane protein 40	-1.28306	-1.3675	-1.34457
TMPRSS3	cg25608949	NM_024022.1	transmembrane protease; serine 3 isoform 1	-1.25987	-1.20152	-1.26862
TNFSF4	cg10861599	NM_003326.2	tumor necrosis factor (ligand) superfamily; member 4	1.36786	1.21705	1.40471
TNS4	cg08696192	NM_032865.3	C-terminal tensin-like	-1.20456	-1.26075	-1.25563
TOP1MT	cg12188860	NM_052963.1	mitochondrial topoisomerase I	-1.24451	-1.3346	-1.32786
TP73	cg25115460	NT_004321.17	tumor protein p73	-1.42886	-1.43248	-1.4266
TP73	cg03846767	NT_004321.17	tumor protein p73	-1.37163	-1.41091	-1.38941
TP73	cg16607065	NT_004321.17	tumor protein p73	-1.33012	-1.37401	-1.31298
TP73	cg26208930	NT_004321.17	tumor protein p73	-1.25573	-1.27381	-1.26602
TPM4	cg16232979	NM_003290.1	tropomyosin 4	1.20878	1.22635	1.21836
TREM2	cg20095587	NM_018965.1	triggering receptor expressed on myeloid cells 2	-1.27182	-1.30602	-1.25897
TRIM29	cg13625403	NM_058193.1	tripartite motif protein TRIM29 isoform beta	-1.30549	-1.31991	-1.33039
TRIM51	cg04962134	NM_032681.1	hypothetical protein LOC84767	-1.26033	-1.28551	-1.24002
UNQ467	cg10305797	NM_207392.1	hypothetical protein LOC388533	-1.28373	-1.24237	-1.23545
WFDC6	cg24765446	NM_080827.1	WAP four-disulfide core domain 6 precursor	-1.37742	-1.42109	-1.41169
ZNF436	cg10347418	NM_030634.1	zinc finger protein 436	-1.23771	-1.30515	-1.28185
ZP4	cg03872376	NM_021186.2	zona pellucida glycoprotein 4 preproprotein	-1.20545	-1.22692	-1.27415
